# Supplementary material
Source: PubMed Central journal article supplement (PMC7309303)
Supplement: TBSD_A_1776158_SM8342.pdf [file TBSD_A_1776158_SM8342.pdf]

Supporting information for:

**An in Silico Approach for Identification of Novel Inhibitors as  
Potential Therapeutics Targeting COVID-19 Main Protease**

Brandon Havranek<sup>1</sup>, Shahidul M. Islam<sup>1\*</sup>

<sup>1</sup>Department of Chemistry, University of Illinois at Chicago, 845 W. Taylor St., Chicago, IL  
60607

Correspondence\*:

email: [mshahidi@uic.edu](mailto:mshahidi@uic.edu), Tel. 312-355-3767

**Table 1. Supporting Information** Top 30 protease inhibitors by binding affinity as determined by AutoDoc Vina. Structural formula and name of compound come from PDB.

| PubChem ID | Structural Formula                                                                                                                                                                                                                                                                                      | Type of Compound                                               | Binding affinity (kcal/mol) |
|------------|---------------------------------------------------------------------------------------------------------------------------------------------------------------------------------------------------------------------------------------------------------------------------------------------------------|----------------------------------------------------------------|-----------------------------|
| 118098670  | (2R,15R)-2-[(1-aminoisoquinolin-6-yl)amino]-4,15,17-trimethyl-7-[1-(1H-tetrazol-5-yl)cyclopropyl]-13-oxa-4,11-diazatricyclo[14.2.2.1~6,10~]henicosane-1(18),6(21),7,9,16,19-hexaene-3,12-dione                                                                                                          | macrocyclic tissue factor-factor VIIa inhibitor                | -10.6                       |
| 72550813   | 1-[(2R,15R)-2-[(1-amino-4-fluoroisoquinolin-6-yl)amino]-4,15,17-trimethyl-3,12-dioxo-13-oxa-4,11-diazatricyclo[14.2.2.1~6,10~]henicosane-1(18),6(21),7,9,16,19-hexaene-7-yl)cyclobutane-1-carboxylic acid                                                                                               | macrocyclic tissue factor-factor VIIa inhibitor                | -10.4                       |
| 104161460  | 1-(3-(5-OXO-4,5-DIHYDRO-1H-1,2,4-TRIAZOL-3-YL)PHENYL)-6-(2'-(PYRROLIDIN-1-YLMETHYL)BIPHENYL-4-YL)-3-(TRIFLUOROMETHYL)-5,6-DIHYDRO-1H-PYRAZOLO[3,4-C]PYRIDIN-7(4H)-ONE                                                                                                                                   | Phenyltriazolinone factor Xa inhibitor                         | -10.2                       |
| 137349331  | (1'R,2R,2'S,6S,24AS)-17-FLUORO-6-(1-METHYL-2-OXOPIPERIDINE-3-CARBOXAMIDO)-19,19-DIOXIDO-5,21,24-TRIOXO-2'-VINYL-1,2,3,5,6,7,8,9,10,11,12,13,14,20,21,23,24,24A-OCTADECALHYDROSPIRO[BENZO[S]PYRROLO[2,1-G][1,2,5,8,18]THIATETRAAZACYCLOICOSINE-22,1'-CYCLOPRO-2-CARBOXYLATEPAN]-2-YL 4-FLUOROISOINDOLINE | macrocyclic protease inhibitor                                 | -10                         |
| LGM (PDB)  | 3-METHYL-1-(3-(5-OXO-4,5-DIHYDRO-1H-1,2,4-TRIAZOL-3-YL)PHENYL)-6-(2'-(PYRROLIDIN-1-YLMETHYL)BIPHENYL-4-YL)-5,6-DIHYDRO-1H-PYRAZOLO[3,4-C]PYRIDIN-7(4H)-ONE                                                                                                                                              | Phenyltriazolinone factor Xa inhibitor                         | -9.9                        |
| 44228999   | 2-[(6-[[3'-(aminomethyl)biphenyl-3-yl]oxy]-4-[(3R)-3-(dimethylamino)pyrrolidin-1-yl]-3,5-difluoropyridin-2-yl]oxy]-4-(dimethylamino)benzoic acid                                                                                                                                                        | non-amidine inhibitor of Urokinase Plasminogen Activator (uPA) | -9.8                        |
| 163632044  | 6-[3-([1,3]oxazolo[4,5-b]pyridin-2-yl)-2-(trifluoromethyl)phenoxy]-1-(2,4,6-trifluorobenzyl)quinazolin-4(1H)-one                                                                                                                                                                                        | Allosteric HCV NS5B Polymerase Thumb Pocket 2 Inhibitor        | -9.6                        |
| 4CE (PDB)  | (2E)-N-[(1S)-1-[5-chloro-4-(4-hydroxy-2-oxo-1,2-dihydroquinolin-6-yl)-1H-imidazol-2-yl]-3-(4-methylpiperazin-1-yl)-3-oxopropyl]-3-[5-chloro-2-(1H-tetrazol-1-yl)phenyl]prop-2-enamide                                                                                                                   | Factor XIa Inhibitor                                           | -9.6                        |

|           |                                                                                                                                                                                                                                                                                 |                                                                       |      |
|-----------|---------------------------------------------------------------------------------------------------------------------------------------------------------------------------------------------------------------------------------------------------------------------------------|-----------------------------------------------------------------------|------|
| 25141820  | (3aR,7S,10S,12R,24aR)-7-cyclopentyl-N-((1R,2S)-1-[(cyclopropylsulfonyl)carbamoyl]-2-ethenylcyclopropyl)-5,8-dioxo-1,2,3,3a,5,6,7,8,11,12,20,21,22,23,24,24a-hexadecahydro-10H-9,12-methanocyclopenta[18,19][1,10,3,6]dioxadiazacyclononadecino[12,11-b]quinoline-10-carboxamide | P2-P4 macrocyclic inhibitor                                           | -9.6 |
| 9F1 (PDB) | methyl [(4R,5E,8S)-11-chloro-8-[(2,6-difluoro-4-methylbenzene-1-carbonyl)amino]-4-methyl-2-oxo-1,3,4,7,8,10-hexahydro-2H-12,9-(azeno)-1,10-benzodiazacyclotetradecin-15-yl]carbamate                                                                                            | Macrocyclic inhibitor of Factor XIa                                   | -9.6 |
| O61 (PDB) | N-[(2S)-1-({2-[5-chloro-2-(1H-tetrazol-1-yl)phenyl]ethyl}amino)-1-oxo-3-phenylpropan-2-yl]-3-oxo-3,4-dihydro-2H-1,4-benzothiazine-7-carboxamide                                                                                                                                 | Benzothiazinone inhibitor                                             | -9.6 |
| 656932    | 2-[3-({METHYL[1-(2-NAPHTHOYL)PIPERIDIN-4-YL]AMINO}CARBONYL)-2-NAPHTHYL]-1-(1-NAPHTHYL)-2-OXOETHYLPHOSPHONIC ACID                                                                                                                                                                | Dual Inhibitor of the Leukocyte Proteases Cathepsin G and Chymase     | -9.6 |
| 10Q (PDB) | 2-((2E,4aR,7aR)-7a-[4-(3-cyanophenyl)thiophen-2-yl]-2-imino-3-methyl-4-oxooctahydro-6H-pyrrolo[3,4-d]pyrimidin-6-yl)pyridine-3-carbonitrile                                                                                                                                     | Beta Amyloid Cleaving Enzyme-1 (BACE1) Inhibitor                      | -9.5 |
| 24765245  | 1-((1S)-1-[4-(3-amino-1H-indazol-6-yl)-5-chloro-1H-imidazol-2-yl]-2-phenylethyl)-3-[5-chloro-2-(1H-tetrazol-1-yl)benzyl]urea                                                                                                                                                    | inhibitors of coagulation factor XIa with novel P1 moieties           | -9.5 |
| 66744599  | METHYL ((15S)-15-(((2E)-3-(5-CHLORO-2-(1H-TETRAZOL-1-YL)PHENYL)-2-PROPENOYL)AMINO)-9-OXO-8,17,19-TRIAZATRICYCLO[14.2.1.0~2,7~]NONADECAN-1(18),2,4,6,16(19)-PENTAEN-5-YL)CARBAMATE                                                                                               | Macrocyclic Factor XIa Inhibitor                                      | -9.5 |
| 7P0 (PDB) | N-[(1S)-1-benzyl-2-[2-[5-chloro-2-(tetrazol-1-yl)phenyl]ethylamino]-2-oxo-ethyl]-4-hydroxy-2-oxo-1H-quinoline-6-carboxamide                                                                                                                                                     | Activated Factor XI Inhibitor                                         | -9.5 |
| 204102    | 1-(3-AMINO-1,2-BENZISOXAZOL-5-YL)-N-(4-{2-[(DIMETHYLAMINO)METHYL]-1H-IMIDAZOL-1-YL}-2-FLUOROPHENYL)-3-(TRIFLUOROMETHYL)-1H-PYRAZOLE-5-CARBOXAMIDE                                                                                                                               | highly potent, selective, and orally bioavailable factor Xa inhibitor | -9.5 |
| 5289412   | N-[(5S,9S,10S,13S)-9-hydroxy-5,10-bis(2-methylpropyl)-4,7,12,16-tetraoxo-3,6,11,17-tetraazabicyclo[17.3.1]tricosan-1(23),19,21-trien-13-yl]-3-(naphthalen-1-yl)-2-(naphthalen-1-ylmethyl)propanamide                                                                            | Endothiapepsin Inhibitor Complex                                      | -9.4 |
| 72550813  | 1-[(2R,15R)-2-[(1-amino-4-fluoroisoquinolin-6-yl)amino]-4,15,17-trimethyl-3,12-dioxo-13-oxa-4,11-diazatricyclo[14.2.2.1~6,10~]henicosan-1(18),6(21),7,9,16,19-hexaen-7-yl]cyclohexane-1-carboxylic acid                                                                         | macrocyclic tissue factor-factor VIIa inhibitor                       | -9.4 |

|           |                                                                                                                                                                             |                                                                         |      |
|-----------|-----------------------------------------------------------------------------------------------------------------------------------------------------------------------------|-------------------------------------------------------------------------|------|
| 10J (PDB) | 3-{5-[(2E,4aR,7aR)-6-benzoyl-2-imino-3-methyl-4-oxooctahydro-7aH-pyrrolo[3,4-d]pyrimidin-7a-yl]thiophen-3-yl}benzotrile                                                     | Beta Amyloid Cleaving Enzyme-1 (BACE1) Inhibitor                        | -9.3 |
| 2EX (PDB) | (4R,4a'S,10a'S)-2-amino-8'-(2-fluoropyridin-3-yl)-1-methyl-3',4',4a',10a'-tetrahydro-1'H-spiro[imidazole-4,10'-pyrano[4,3-b]chromen]-5(1H)-one                              | beta-site amyloid precursor protein cleaving enzyme 1 (BACE1) inhibitor | -9.3 |
| 3YU (PDB) | (2E)-N-[(1S)-1-[4-(3-amino-1H-indazol-6-yl)-1H-imidazol-2-yl]-2-phenylethyl]-3-[5-chloro-2-(1H-tetrazol-1-yl)phenyl]prop-2-enamide                                          | inhibitor of coagulation factor Xla with novel P1 moieties              | -9.3 |
| 569 (PDB) | (5R)-2-amino-5-(4-fluoro-3-pyrimidin-5-ylphenyl)-3-methyl-5-[4-(trifluoromethoxy)phenyl]-3,5-dihydro-4H-imidazol-4-one                                                      | disubstituted aminohydantoin                                            | -9.3 |
| 90176081  | (11S)-4,9-dioxo-N-[(2S)-1-oxo-3-phenylpropan-2-yl]-17,22-dioxa-10,30-diazatetracyclo[21.2.2.2~13,16~.1~5,8~]triacont-1(25),5,7,13,15,23,26,28-octaene-11-carboxamide        | cyclic peptide inhibitor                                                | -9.3 |
| 5SS (PDB) | 4-(aminomethyl)-~{N}-[(1~{S})-1-[4-(3-oxidanyl-1~{H})-indazol-5-yl]pyridin-2-yl]-2-phenyl-ethyl]cyclohexane-1-carboxamide                                                   | pyrimidine-based Factor Xla inhibitor                                   | -9.3 |
| 121225439 | (2R,15R)-2-[(1-aminoisoquinolin-6-yl)amino]-8-fluoro-7-hydroxy-4,15,17-trimethyl-13-oxa-4,11-diazatricyclo[14.2.2.1~6,10~]henicosa-1(18),6(21),7,9,16,19-hexaene-3,12-dione | Macrocyclic Factor VIIa Inhibitor                                       | -9.3 |
| 3UT (PDB) | (5S)-3-(5,6-dihydro-2H-pyran-3-yl)-1-fluoro-7-(2-fluoropyridin-3-yl)spiro[chromeno[2,3-c]pyridine-5,4'-[1,3]oxazol]-2'-amine                                                | BACE1 Inhibitor                                                         | -9.2 |
| 43K (PDB) | (5S)-7-(2-fluoropyridin-3-yl)-3-(2-fluoropyridin-4-yl)spiro[chromeno[2,3-c]pyridine-5,4'-[1,3]oxazol]-2'-amine                                                              | BACE1 Inhibitor                                                         | -9.2 |
| 118098670 | (2R)-2-[(1-aminoisoquinolin-6-yl)amino]-4,11-diazatricyclo[14.2.2.1~6,10~]henicosa-1(18),6(21),7,9,16,19-hexaene-3,12-dione                                                 | Macrocyclic Coagulation Factor VIIa Inhibitor                           | -9.2 |
| 7F3 (PDB) | (1S)-4-fluoro-1-(4-fluoro-3-pyrimidin-5-ylphenyl)-1-[2-(trifluoromethyl)pyridin-4-yl]-1H-isoindol-3-amine                                                                   | BACE1 Inhibitor                                                         | -9.2 |

**Table 2. Supporting Information** Top ten inhibitors organized by decreasing binding affinity obtained from molecular docking and MD simulation.

| ID        | Ligand                                                                              | Binding Affinity Kcal/mol | ID        | Ligand                                                                               | Binding Affinity kcal/mol |
|-----------|-------------------------------------------------------------------------------------|---------------------------|-----------|--------------------------------------------------------------------------------------|---------------------------|
| 118098670 | 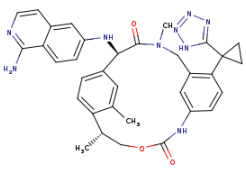   | -10.6                     | 163632044 |    | -9.6                      |
| 104161460 |    | -10.2                     | 656932    |    | -9.6                      |
| 137349331 |  | -10                       | 25141820  |  | -9.6                      |
| 44228999  |  | -9.8                      | 10Q (PDB) |  | -9.5                      |

|         |                                                                                   |      |          |                                                                                    |      |             |                                                                                     |      |
|---------|-----------------------------------------------------------------------------------|------|----------|------------------------------------------------------------------------------------|------|-------------|-------------------------------------------------------------------------------------|------|
| 5289412 | 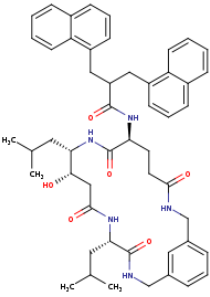 | -9.4 | 90176081 |  | -9.3 | N3<br>(PDB) |  | -7.6 |
|---------|-----------------------------------------------------------------------------------|------|----------|------------------------------------------------------------------------------------|------|-------------|-------------------------------------------------------------------------------------|------|

**Figure 1. Supporting Information** Last frame of 118098670, 104161460, 5289412, 163632044, 137349331, and 90176081 inhibitor complexes after 100ns MD simulation (Red-Main Protease, Yellow-Ligand), aligned with respect to the PDB x-ray crystal structure (6LU7) of the COVID-19 Main Protease (Blue).

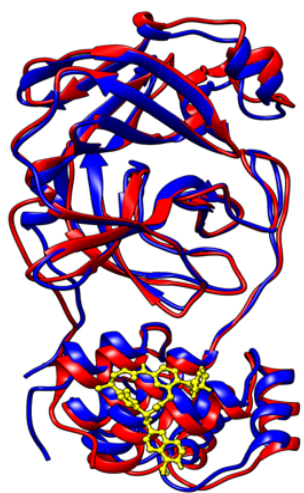

118098670

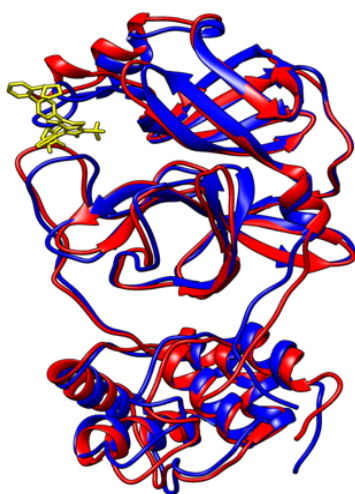

104161460

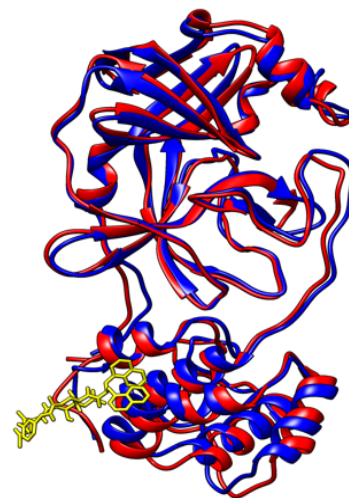

5289412

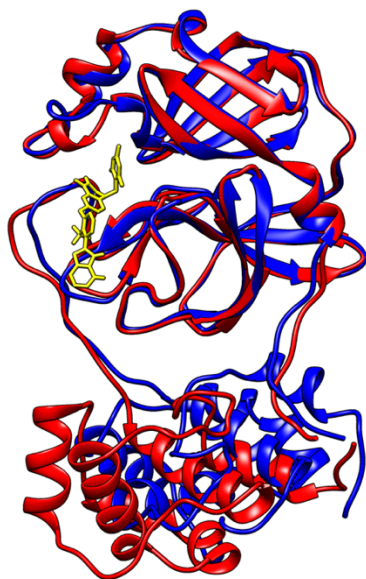

163632044

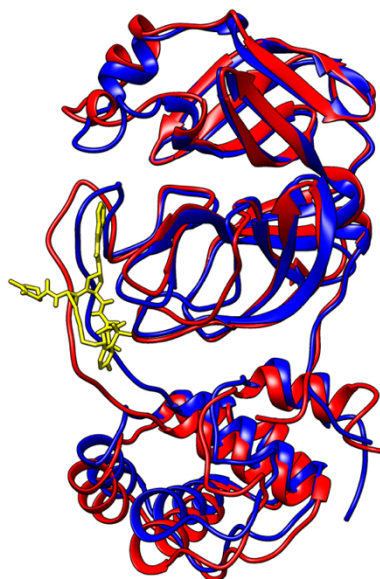

137349331

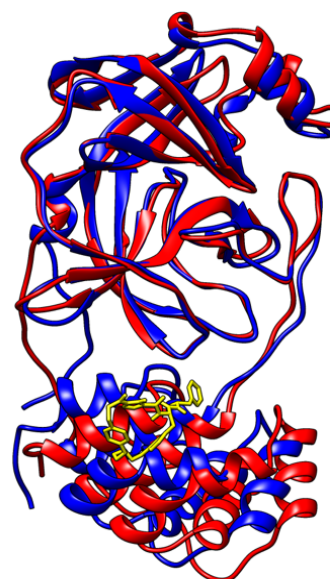

90176081

**Figure 2. Supporting Information** Binding pocket of the malaria drug, hydroxychloroquine, with the COVID-19 main protease.

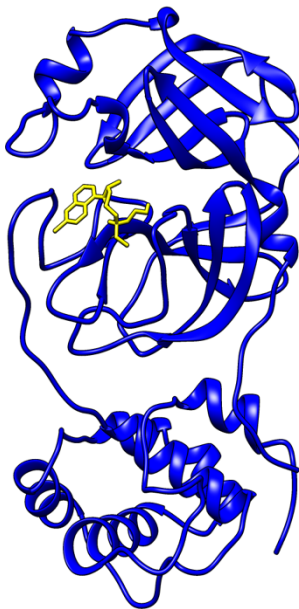

Molecular docking was performed to dock the antimalaria drug hydroxychloroquine to the COVID-19 main protease. Our docking results indicate that the binding pocket of hydroxychloroquine was very similar to proposed 104161460 inhibitor. The binding affinity of hydroxychloroquine to the coronavirus main protease was  $-6.3\text{kcal/mol}$ .



**Figure 3. Supporting Information** Binding pocket of the HIV protease inhibitor, lopinavir, with the COVID-19 main protease.

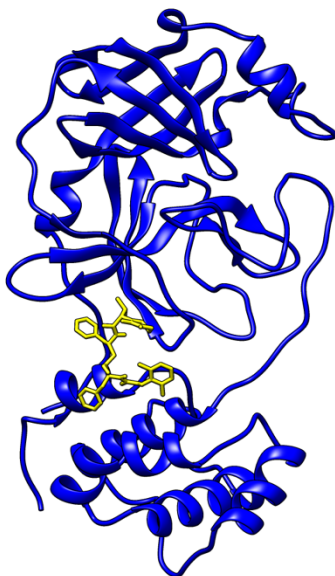

Molecular docking was performed with the HIV protease inhibitor drug lopinavir. The binding pocket of lopinavir in the COVID-19 main protease was very similar to the 118098670 and 5289412 proposed inhibitors. Binding affinity of lopinavir for the main protease was calculated at -8.2kcal/mol.

**Figure 4. Supporting Info** Scatter plot of theoretical dissociation constants (Kd) obtained from molecular docking versus experimental dissociation constant (Kd) values .

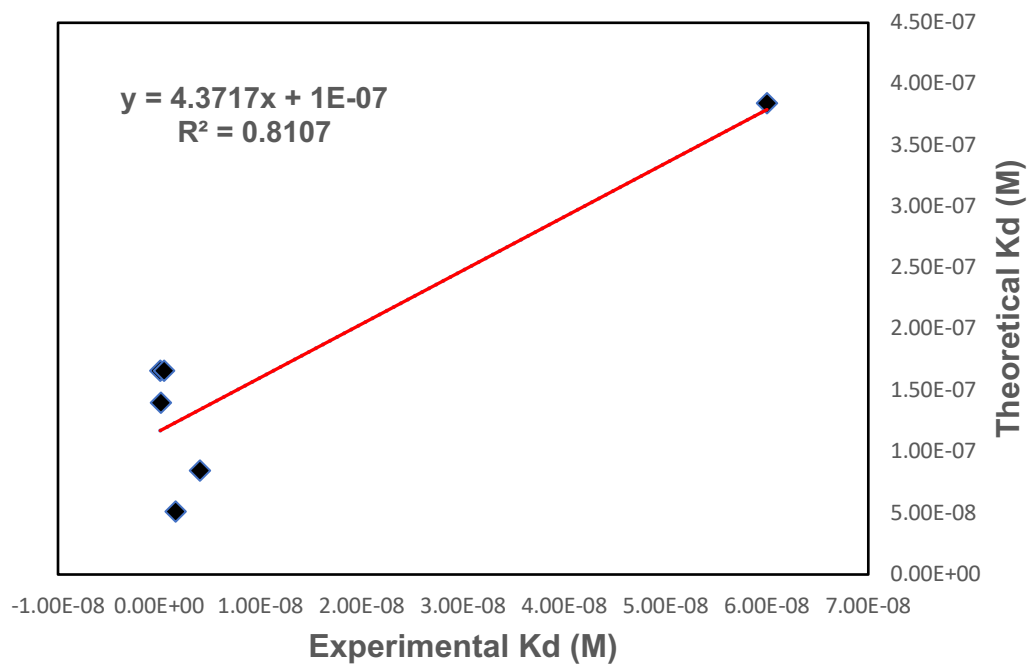

**Figure 5. Supporting Information.** Cartoon representation of (A) 118098670 , (B)163632044 , (C)137349331, (D)104161460, (E)5289412, and (F)90176081 inhibitors in complex with COVID-19 main protease with the major native contacts after 100ns MD simulation.

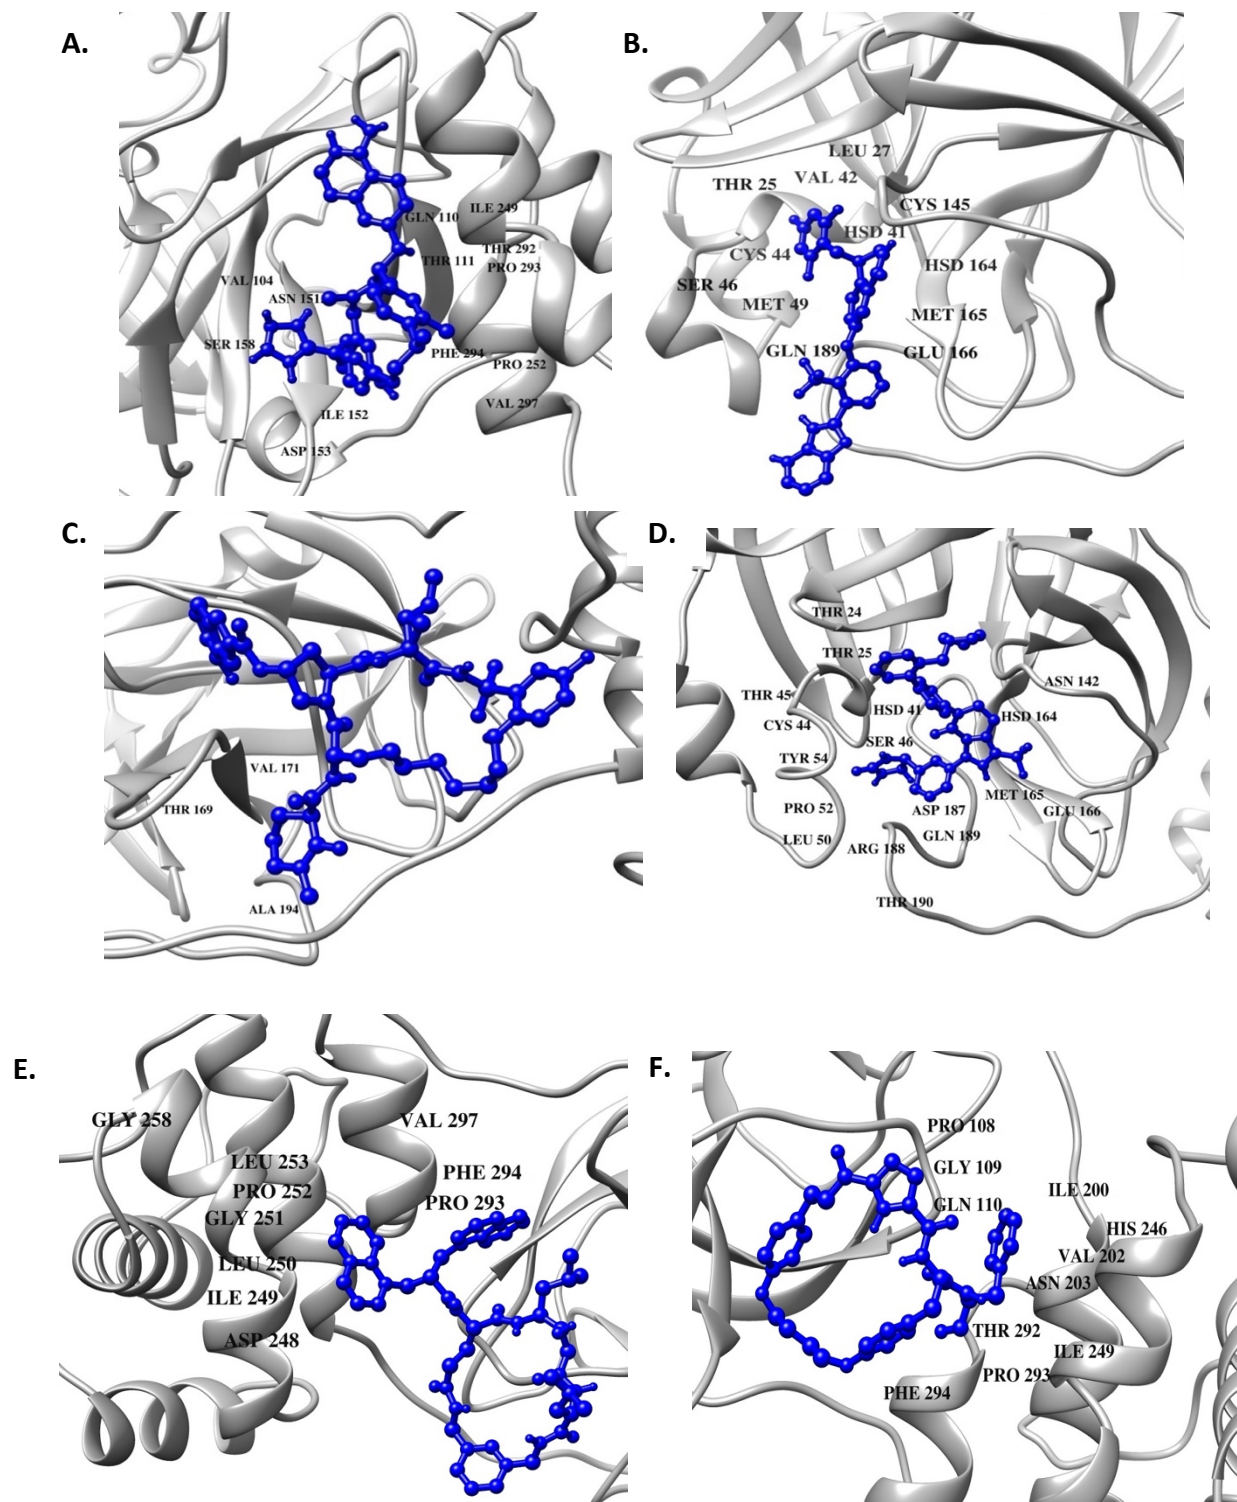

## SI References

- (1) Chua, K. C. H.; Pietsch, M.; Zhang, X.; Hautmann, S.; Chan, H. Y.; Bruning, J. B.; Gütschow, M.; Abell, A. D. Macrocyclic Protease Inhibitors with Reduced Peptide Character. *Angew. Chemie - Int. Ed.* **2014**, *53* (30), 7828–7831. <https://doi.org/10.1002/anie.201404301>.
